# Supplementary material for: Accurate 16S Absolute Quantification Sequencing Revealed Vaginal Microecological Composition and Dynamics During Mixed Vaginitis Treatment With Fufang FuRong Effervescent Suppository
Source: Frontiers journal article supplement (doi:10.3389/fcimb.2022.883798), 2022-05-13

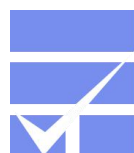

## CONSORT 2010 Flow Diagram

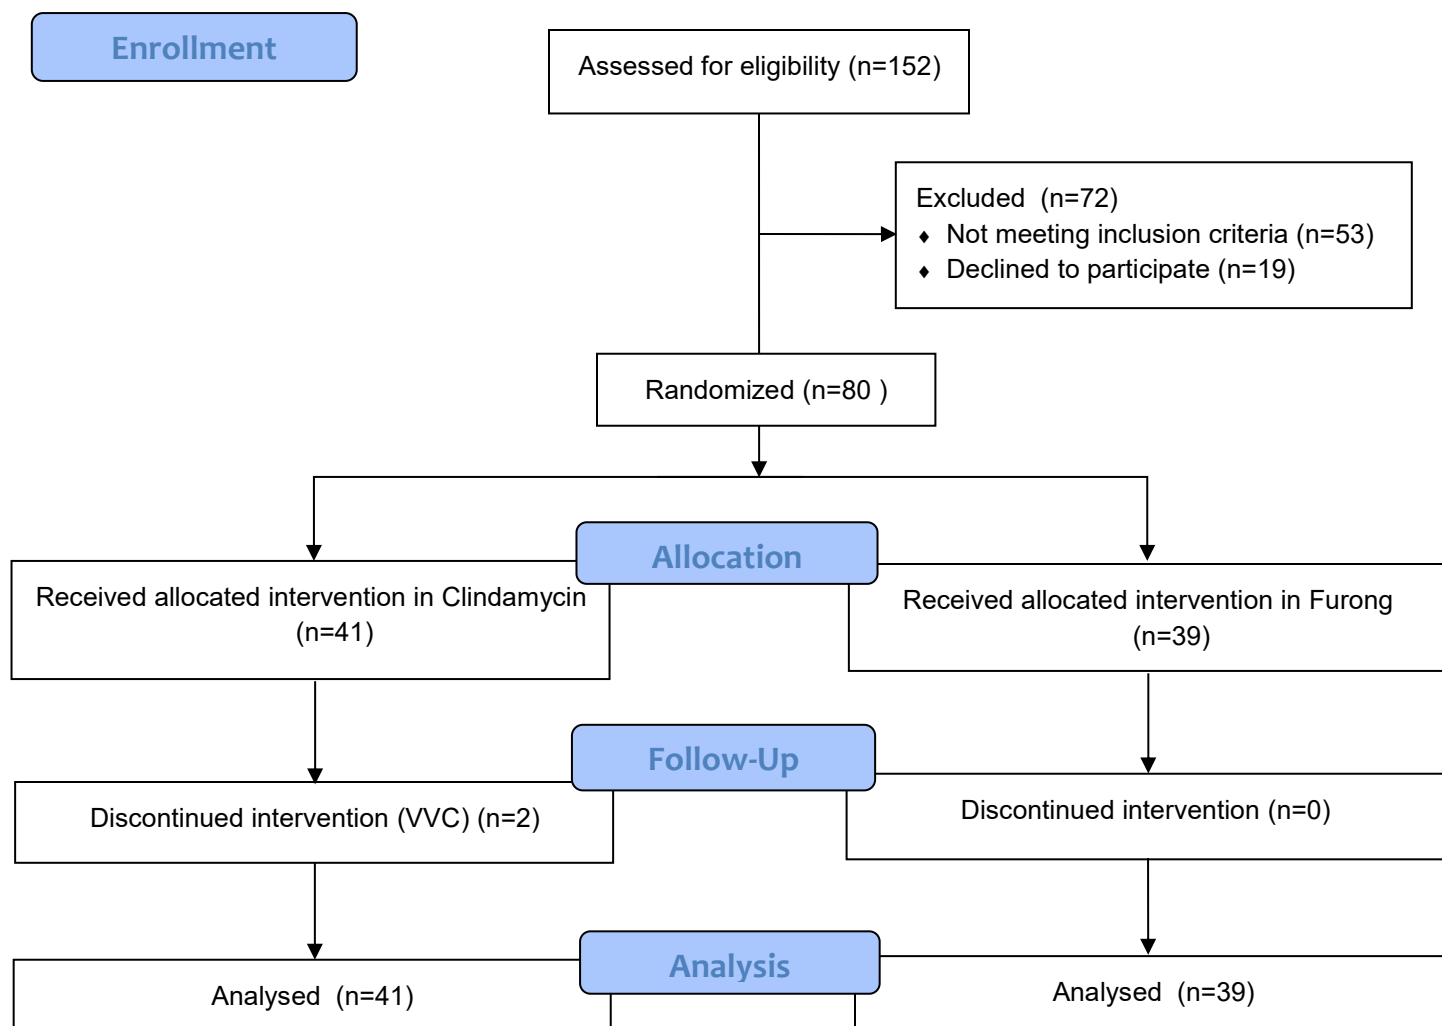

Supplement: Data_Sheet_4.PDF [file Data_Sheet_4.PDF]
